# Supplementary material
Source: publisher figshare collection journal article supplement (https://sage.figshare.com/ndownloader/files/23208254)
Supplement: Supplementary file 1 [file 23208254]

## Sheet: All data
Control Point	LichenREF	RMSE (mm)	Observations	Initial date, ti (dd-mm-yyyy)	Final date, tf (dd-mm-yyyy)	Time period, Δt (years)	Total lichen Area		Largest incribed circle
							Ai (mm2)	Growth rate (mm2/yr)	Ai (mm2)	Growth rate (mm2/year)	Øi (mm)	Growth rate (mm/year)
RF01 S. Lourenço rock-fall 2011/2012	1	0.28		2013-09-25	2020-01-19	6.32055	0	0.235168	0	0.138723	0	0.0955308
	2	0.28		2013-09-25	2020-01-19	6.32055	0	0.168674	0	0.101647	0	0.0512905
	3	0.23		2013-09-25	2020-01-19	6.32055	0	0.205185	0	0.147694	0	0.108286
	4	0.23		2013-09-25	2020-01-19	6.32055	0	0.122244	0	0.107357	0	0.0572148
	5	0.23		2013-09-25	2020-01-19	6.32055	0	0.0849243	0	0.0692111	0	0.0237791
	6	0.23		2013-09-25	2020-01-19	6.32055	0	0.229167	0	0.156228	0	0.121161
	7	0.23		2013-09-25	2020-01-19	6.32055	0	0.234117	0	0.166531	0	0.13767
	8	0.23		2013-09-25	2020-01-19	6.32055	0	0.164527	0	0.142061	0	0.100184
	9	0.16		2013-09-25	2020-01-19	6.32055	0	0.171871	0	0.132782	0	0.0875225
	10	0.11		2013-09-25	2020-01-19	6.32055	0	0.190764	0	0.162981	0	0.131861
	11	0.11		2013-09-25	2020-01-19	6.32055	0	0.210135	0	0.177542	0	0.156476
	12	0.11		2013-09-25	2020-01-19	6.32055	0	0.135656	0	0.113586	0	0.0640462
	13	0.11		2013-09-25	2020-01-19	6.32055	0	0.117444	0	0.101379	0	0.0510195
	14	0.21		2013-09-25	2020-01-19	6.32055	0	0.180951	0	0.140119	0	0.0974628
	15	0.13		2013-09-25	2020-01-19	6.32055	0	0.243311	0	0.181249	0	0.163078
	16	0.13		2013-09-25	2020-01-19	6.32055	0	0.124858	0	0.0954806	0	0.0452559
	17	0.13		2013-09-25	2020-01-19	6.32055	0	0.143047	0	0.115982	0	0.0667773
RF02 S. Lourenço rock-fall 2005/2006	1	0.9		2013-09-25	2020-01-19	6.32055	9.38272	4.7034	7.11732	2.74076	3.01032	0.406305
	2	0.9	RMSE > ΔØ	2013-09-25	2020-01-19	6.32055	16.6234	3.14876	13.8212	0.513626	4.19496	0.0738401
	3	0.9		2013-09-25	2020-01-19	6.32055	3.47223	2.40221	2.45342	1.72211	1.76743	0.372366
	4	0.9		2013-09-25	2020-01-19	6.32055	17.5999	3.01009	12.5465	1.056	3.99684	0.15033
	5	0.9		2013-09-25	2020-01-19	6.32055	16.0388	3.36953	9.76598	1.17525	3.52625	0.182369
	6	0.9		2013-09-25	2020-01-19	6.32055	27.4978	5.57866	15.57	1.56001	4.45245	0.195833
	7	0.9		2013-09-25	2020-01-19	6.32055	9.37852	3.69874	5.16721	2.98805	2.56497	0.469749
	8	0.8		2013-09-25	2020-01-19	6.32055	9.68939	6.51486	6.82316	3.2161	2.94746	0.463901
	9	0.8		2013-09-25	2020-01-19	6.32055	28.5828	7.25084	19.7103	3.98671	5.00958	0.403781
	10	0.8		2013-09-25	2020-01-19	6.32055	18.2048	5.6007	14.1397	3.54672	4.24302	0.408101
	11	0.8	RMSE > ΔØ	2013-09-25	2020-01-19	6.32055	6.60563	0.931544	3.45018	0.290525	2.09593	0.078865
	12	0.8		2013-09-25	2020-01-19	6.32055	14.4751	5.34	11.0561	1.85933	3.75194	0.258989
AF02 Sta Susana Forte 1944-1949	1	0.76		2013-12-26	2020-01-20	6.07123	12.9607	2.39633	7.98092	1.68036	3.18773	0.267461
	2	0.62		2013-12-26	2020-01-20	6.07123	23.5637	2.90282	14.7256	1.09022	4.33004	0.145456
	3	0.62		2013-12-26	2020-01-20	6.07123	51.7208	8.26425	36.8112	4.53432	6.84613	0.363165
	4	0.62		2013-12-26	2020-01-20	6.07123	27.1666	3.67497	12.8638	1.69613	4.04706	0.227863
	5	0.72		2013-12-26	2020-01-20	6.07123	12.17	2.60319	8.146	2.02272	3.22053	0.309532
	6	0.72		2013-12-26	2020-01-20	6.07123	2.88909	0.370149	2.24663	0.0967316	1.6913	0.0342994
	7	0.72		2013-12-26	2020-01-20	6.07123	32.0831	3.40165	19.8711	2.81178	5.02998	0.301143
	8	0.72		2013-12-26	2020-01-20	6.07123	88.0112	5.39722	55.1464	3.8842	8.37941	0.268906
	9	1.2		2013-12-26	2020-01-20	6.07123	134.8	13.52	82.582	10.7958	10.2541	0.573047
	10	1.2	RMSE > ΔØ	2013-12-26	2020-01-20	6.07123	23.1695	1.50991	13.4764	0.74512	4.1423	0.106244
	11	1.2	RMSE > ΔØ	2013-12-26	2020-01-20	6.07123	329.855	11.2517	190.423	3.17464	15.5709	0.126679
	12	0.82		2013-12-26	2020-01-20	6.07123	57.8517	6.29472	45.5425	4.49559	7.61488	0.331923
	13	0.3		2013-12-26	2020-01-20	6.07123	60.2611	7.7592	30.3103	9.26323	6.21227	0.705825
	14	0.86		2013-12-26	2020-01-20	6.07123	10.8234	1.95329	6.28876	1.69918	2.82968	0.291269
	15	0.86		2013-12-26	2020-01-20	6.07123	1.16986	1.3615	0.73957	1.13964	0.970386	0.35451
	16	0.86		2013-12-26	2020-01-20	6.07123	50.4659	4.38888	35.5656	4.45676	6.7293	0.362387
	17	0.86		2013-12-26	2020-01-20	6.07123	35.2687	4.19062	25.9748	1.46776	5.75084	0.150522
	18	0.86		2013-12-26	2020-01-20	6.07123	10.3038	3.30791	7.33873	2.04363	3.05679	0.322396
	19	0.86		2013-12-26	2020-01-20	6.07123	4.26488	1.09517	3.02143	0.848767	1.96138	0.208323
	20	0.86		2013-12-26	2020-01-20	6.07123	1.17897	2.14723	0.720941	1.0627	0.958087	0.339956
	21	0.86		2013-12-26	2020-01-20	6.07123	0.840602	1.11369	0.505686	0.907437	0.802408	0.323655
	22	0.86		2013-12-26	2020-01-20	6.07123	2.24343	1.34391	1.28842	1.02204	1.28081	0.297805
	23	2.09		2013-12-26	2020-01-20	6.07123	26.2467	5.43814	20.6469	3.90934	5.12723	0.393654
	24	2.09		2013-12-26	2020-01-20	6.07123	212.122	17.4327	78.705	14.1831	10.0105	0.737183
	25	2.09	RMSE > ΔØ	2013-12-26	2020-01-20	6.07123	49.329	5.189	31.2925	3.48127	6.31212	0.30606
	26	2.09		2013-12-26	2020-01-20	6.07123	60.5606	4.94353	38.8312	5.1742	7.03146	0.399547
	27	2.09	RMSE > ΔØ	2013-12-26	2020-01-20	6.07123	72.6107	4.91437	52.6593	2.95762	8.18828	0.213111
	28	2.09		2013-12-26	2020-01-20	6.07123	35.4682	6.99182	13.8298	5.00025	4.19627	0.544286
	29	2.09		2013-12-26	2020-01-20	6.07123	76.8399	10.7562	51.7731	6.89066	8.11909	0.460881
	30	0.98		2013-12-26	2020-01-20	6.07123	12.5478	1.44924	8.05477	1.13394	3.20244	0.190881
	31	0.98	RMSE > ΔØ	2013-12-26	2020-01-20	6.07123	34.2919	2.52557	21.8884	1.43034	5.27913	0.158112
	32	0.98		2013-12-26	2020-01-20	6.07123	9.98056	2.84571	7.15424	2.08036	3.01812	0.32957
	33	0.98		2013-12-26	2020-01-20	6.07123	41.8813	4.11299	20.4596	2.9829	5.10392	0.313578
	34	0.98		2013-12-26	2020-01-20	6.07123	53.1067	4.01141	28.4192	4.12007	6.01535	0.367779
AF03 S Miguel Arcanjo 1645	1	0.85	RMSE > ΔØ	2015-11-13	2020-01-25	4.20274	7.79221	0.380526	2.8241	0.115118	1.89625	0.037121
	2	0.85		2015-11-13	2020-01-25	4.20274	5.78658	1.37577	2.33216	0.758324	1.72319	0.220738
	3	0.36	loosing areola in the middle of the thallus	2015-11-13	2020-01-25	4.20274	765.25	20.9009	535.954	3.64334	26.1227	0.0881641
	4	1.08	RMSE > ΔØ	2015-11-13	2020-01-25	4.20274	73.3864	3.10014	51.316	-0.387319	8.08317	-0.0307506
	5	1.08	RMSE > ΔØ	2015-11-13	2020-01-25	4.20274	318.498	5.25395	208.885	-3.49415	16.3083	-0.138885
	6	1.1	RMSE > ΔØ	2015-11-13	2020-01-25	4.20274	463.891	10.8862	311.946	2.89287	19.9294	0.0915259
	7	0.92	RMSE > ΔØ	2015-11-13	2020-01-25	4.20274	32.9424	3.80799	16.1322	1.40597	4.53213	0.182116
	8	0.92	RMSE > ΔØ	2015-11-13	2020-01-25	4.20274	211.109	5.23754	159.61	4.14822	14.2556	0.18045
	9	0.92	RMSE > ΔØ	2015-11-13	2020-01-25	4.20274	1.93392	0.507383	1.21933	0.160778	1.24599	0.0731277
	10	0.79	RMSE > ΔØ	2015-11-13	2020-01-25	4.20274	508.708	5.90377	345.752	-2.11767	20.9815	-0.0646729
	11	0.55	RMSE > ΔØ	2015-11-13	2020-01-25	4.20274	110.044	3.74541	86.9986	-3.63672	10.5247	-0.230595
	12	0.84	RMSE > ΔØ	2015-11-13	2020-01-25	4.20274	8.87817	1.97938	5.80885	0.645032	2.71957	0.136581
AF06 Sta Susana fencing wall 1657-1777	1	0.77		2013-12-26	2020-01-26	6.08767	77.8134	4.46716	39.637	2.79714	7.10404	0.228326
	2	0.77		2013-12-26	2020-01-26	6.08767	1.86142	1.36362	1.44187	1.10954	1.35493	0.308088
	3	0.77		2013-12-26	2020-01-26	6.08767	1.97728	1.25026	1.2032	1.03626	1.23772	0.304691
	4	0.77		2013-12-26	2020-01-26	6.08767	1.31109	1.18911	0.865114	0.84324	1.04952	0.281566
	5	0.61	RMSE > ΔØ	2013-12-26	2020-01-26	6.08767	281.657	5.88566	183.683	2.30762	15.2929	0.0942929
	6	0.61		2013-12-26	2020-01-26	6.08767	62.43	6.49871	44.2453	5.11898	7.50566	0.376653
AF05 Baularte Redondo 1558	1	0.249	loosing areola in the middle of the thallus	2016-08-05	2020-01-26	3.47671	968.725	-6.97987	571.854	-5.46407	26.9835	-0.130002
	2	0.2	loosing areola in the middle of the thallus	2016-08-05	2020-01-26	3.47671	1177.86	-9.14945	880.708	-10.0143	33.4866	-0.192304
	3	0.69	loosing areola in the middle of the thallus	2016-08-05	2020-01-26	3.47671	549.911	-4.59227	352.373	-16.9749	21.1815	-0.533554
		Records in red were removed from the dataset
